# Supplementary material
Source: publisher figshare collection journal article supplement (https://wiley.figshare.com/articles/dataset/_/3530189)
Supplement: Supplementary file 1 [file 1]

Archive with 6 entries (6 files):
- appendix-A.htm
- CORONAproposal.2001.pdf
- CORONASteeringCmteeminutes.2002.pdf
- Corona.minutes.2002.pdf
- Corona.minutes.2003.pdf
- Corona.minutes.2004.pdf
