# Supplementary material
Source: publisher figshare collection journal article supplement (https://wiley.figshare.com/articles/dataset/_/3530189)
Supplement: Supplementary file 1 [file 1 › appendix-A.htm]

Ecological Archives E089-185-A1


### *Ecological Archives* E089-185-A1

### **Clifford W. Cunningham. 2008. Lessons learned from coordinating research on the North Atlantic (CORONA). *Ecology* 89:S1–S2.**

---

Appendix A. Additional information on CORONA, including verbatim minutes of the meetings.

PDF files of the documents:

|  |  |
| --- | --- |
| (1) The original CORONA proposal -- | Click here. |
|  |  |
| (2) Verbatim minutes of the April 2002 CORONA Steering Committee meeting, Wrightsville Beach, North Carolina -- | Click here. |
|  |  |
| (3) Verbatim minutes of the August 2002 CORONA meeting at Shoals Marine Laboratory, Maine -- | Click here. |
|  |  |
| (4) Verbatim minutes of the August 2003 CORONA meeting in Reykjavik, Iceland -- | Click here. |
|  |  |
| (5) Verbatim minutes of the July 2004 CORONA meeting in the Marine Biological Laboratory, Plymouth, UK -- | Click here. |

A searchable database, funded partly by CORONA, North Atlantic Marine Register of Marine Species: with taxonomy and geographic range information for marine species from both coasts of the North Atlantic, can be found at:

http://www.vliz.be/vmdcdata/narms/

---


[Back to E089-185]
